## **Frontiers of cervical cancer research: an analysis from the top 100 most influential articles in the field**

Lei Liang<sup>1</sup>. Chuangxiu Song<sup>2</sup>. Chun Chang<sup>1</sup>. Shichao Chen<sup>1</sup>. Bo Yang<sup>1</sup>.

Li Sun<sup>1\*</sup>

<sup>1</sup> The 980 Hospital of the Joint Logistic Support Force of the Chinese People's Liberation Army. Shijiazhuang City, Hebei Province 050082, China;

<sup>2</sup>Neck-Shoulder and Lumbocrural Pain Hospital of Shandong First Medical University. Jinan City, Shandong Province 250355, China.

\* Correspondence: Li Sun, E-mail:sunl0117@126.com (Note: Lei Liang and Chuangxiu Song are the co-first authors)

### **Abstract**

**Background:** Cervical cancer (CC) is one of the common gynecological malignancies, which has a serious negative impact on the quality of life of patients, and brings huge economic pressure and burden to society. The most effective treatment for CC has become an important issue worldwide.

**Method:** In order to determine the current research hotspots and development trends in a particular field, we conducted a bibliometric analysis of the top 100 cited papers. To achieve this, we searched for the top 100 most cited papers on the Science Citation Index Expanded (SCI Expanded) on the Web of Science (WOS), based on the CCS (citation count score). We then reviewed relevant literature from different years, countries/regions, institutions, authors, keywords, and references. Using VOS viewer and Cite Space software, we constructed a knowledge map, and finally compiled the relevant information we retrieved from the literature using Excel. Through this process, we were able to make predictions about the current focus and trends in the field.

**Results:** Between 2013 and 2023, numerous journals published the top 100 cited research papers. The International Agency for Research on Cancer and the American Cancer Society were the most cited institutions. The United States contributed the most papers, followed by France and England. The top 5 keyword co-occurrences were cervical cancer, women, human papillomavirus, United States, and colorectal cancer. Cluster analysis results suggest that future research in CCS may focus on prophylaxis and HPV vaccination.

**Conclusion:** Bibliometric analysis can quickly and intuitively identify the focus and boundaries of cervical cancer research. Our findings suggest that prophylaxis and HPV vaccination may be the focus and trend for future research on cervical cancer.

**Keywords:** cervical cancer, cervical cancer screening, bibliometric analysis,

CiteSpace, visualization, VOSviewer

**Abbreviations:** CCS = cervical cancer screening; CC = cervical cancer ;IF = impact factor, RCT = randomized controlled trial, WoSCC = Web of Science Core Collection.

## 1. Introduction

Cervical cancer is one of the common female malignancies, and persistent infection with high-risk human papillomavirus (HPV) is the main cause of its development. Globally, cervical cancer is characterized by unequal incidence and mortality rates [1]. Data from the 2018 Global Cancer Registry report show that around 85% of cervical cancers occur in low- and middle-income countries, and that cervical cancer incidence in low- and middle-income countries is nearly twice the incidence of high-income countries, with a mortality rate of around three times that of high-income countries [2]. Without aggressive and effective measures, more than 44 million women in low- and middle-income countries will suffer from cervical cancer in the next 50 years. It significantly increases the economic burden on individuals and society, as well as the mental stress on patients and their families. Therefore, the prevention, control, and treatment of cervical cancer are of great significance to patients, families, and society [3]. Cervical cancer is currently the only cancer with a clear etiology that is preventable and curable, and with the three-tier prevention and control means of HPV vaccine, screening, and early diagnosis and treatment, it is expected to be the world's first malignant tumor to be eliminated [4].

The first article on CCS was published in 2013 year [5]. In the past 10 years, researchers have made significant progress in the diagnosis and screening of CC. However, understanding the overall progress and research trends in the CC disease area is challenging, and scientific analyses using bibliometric techniques are essential [6-7]. Screening by understanding the top 100 cited articles in the field of CC will provide researchers with a deeper understanding of current research priorities. Bibliometric analyses can fully assist researchers in studying a particular current research area and is a very effective method of bibliometric analysis. Unfortunately, no studies with a similar focus were found in our search of the prior literature. The

bibliometric analysis was used to identify the top 100 cited articles in the field and to analyze the research hotspots and research trends in the field. We believe that this study will help accelerate the development of the field of CCS research and encourage scholars to produce new findings in this area.

## **2. Materials and Methods**

### **2.1. Search strategy**

We used WoSCC literature related to managing cervical cancer screening against cervical cancer. The search strategy included cervical cancer screening and its synonyms (subject terms), and cervical cancer and its synonyms. The publication timeframe was from the build to December 2023 (search date: 01 January 2024). We finally included the top 100 most cited articles for the study. The specific search strategy is shown in **2.2. Inclusion criteria**

Publications are ranked in descending order of overall citation frequency. Selected articles and reviews from different academic journals including Cervical Cancer Screening, and Cervical Malignancies. Letters, conference abstracts, book reviews, conference presentations, and news reports were excluded. Initial screening was done independently by two scholars to eliminate irrelevant topics. They identified the most cited publications by reading the titles, abstracts, keywords, and full text of 100 papers. If two researchers disagree on whether an article should be included, we must consult a third researcher to find a solution.

### **2.3. Bibliometric analysis**

According to the system functionality of WoSCC, after downloading the details of country/region distribution, year of publication, institution, journal, authors, and keyword-related documents, we used Office 16 to sort and analyze the publications. CiteSpace 6.1.R6, VOSviewer 1.6.19, Scimago Graphica 1.0.30 Visual analyses of article features to identify current research hotspots and potential trends in the field of CCS. VOSviewer is a bibliometrics application for the creation of scientometric networks and knowledge visualization [8]. CiteSpace was used for identifying the network of co-authors of countries/institutions, bitmap analysis, and keyword

detection with citation explosion [9]. Citation explosion indicates an increase in hot topics for potential work in the field over a given time, which is an important indicator for identifying research trends.

#### **2.4. Bibliometric analysis terminology**

Knowledge graph visualization is an outgrowth of the development of graphical data technologies. Data visualization is the aggregation of available information into a large network that contains semantic models of data for users to query and explore. In this way, raw data is converted into graphical information and the information is presented more intuitively and visually. Intermediate centrality is the number of times a node is located on the shortest path between other nodes and is one of the key metrics for measuring the importance of a node. Nodes with intermediate centrality greater than 0.1 are generally considered to be critical nodes. The more times a node lies on the shortest path, the higher the centrality of the node.

#### **2.5 Ethical review**

As this article is a visual analysis summary of previously published articles, it does not need to pass ethical review.

### **3.Results**

#### **Citation characteristics of the included**

##### **3.1 Articles**

Between 1929 and 2023, 28,443 articles were published on early screening for CC. Two researchers combed through the research topics and article abstracts to exclude those articles in which CCS was not the main research topic. The eligible articles were added to this study in descending order according to the frequency of citation.

The top 100 cited papers are shown in Table 2. These 100 papers received a total of 56802 citations. There are 6,576 references in the top 100 cited papers. The most frequently cited article is “Global Cancer Statistics.2012” [10] by Torre, Lindsey A. (14567 citations). Next is “Cancer Statistics,2019” [11] by Siegel, RL (4436 citations), “Global Cancer Incidence and Mortality Rates and Trends-An Update” [12] (2501 citations), “The Global Burden of Cancer 2013 Global

Burden of Disease Cancer Collaboration” [13] (2107 citations), “Estimates of incidence and mortality of cervical cancer in 2018: a worldwide analysis” [14] (1785 citations), “Global surveillance of cancer survival 1995-2009: analysis of individual data for 25,676,887 patients from 279 population-based registries in 67 countries (CONCORD-2)” [15] (1673 citations), “Cervical cancer” [1] (1202 citations), “Worldwide burden of cancer attributable to HPV by site, country and HPV type” [16] (1181 citations), “Efficacy of HPV-based screening for prevention of invasive cervical cancer: follow-up of four European randomised controlled trials” [17] (1139 citations), “Cancer statistics for African Americans, 2019” [18] (1116 citations). These are the articles that have been cited more than 1,000 times.

### **3.2 Year of publication and citation**

We depict their annual distribution, annual citation frequency distribution, and overall citation frequency distribution in a line graph (Figure 1). The top 100 most cited papers were written between 2013 and 2023. Fourteen of the top 100 most-cited papers were published in 2017, 2018, and 2019. The paper with the highest total number of citations was published in 2015 (14,567 citations) and had the greatest impact on CC research.

### **3.3 Author and co-author analysis**

There was active cooperation among some of the author clusters. (Fig. 2) The top 100 cited publications were contributed by 264 different authors. Jemal, Ahmedin authored the greatest number of papers (N = 12), followed by Sigel, Rebecca L (N = 8). Utilizing Jemal, Ahmedin as its core, the network’s total connection strength is 292, with the largest group of linked objects consisting of 184 items. In Figure 2, we can see that there is a direct linkage between Jemal, Ahmedin, and Sigel, Rebecca L. This means that they have a collaborative relationship, as a team to conduct their research.

### **3.4 Distribution of countries/regions and institutions**

#### **Countries/regions**

A total of 240 countries/regions did research on the top 100 cited papers. The USA contributed the most publications (N = 70), followed by the FRANCE (N = 25) and the ENGLAND (N = 19). Seven main clusters were formed by all the countries/regions. The USA established the largest national cooperative network,

encompassing 70 countries/regions, followed by France, which covered 25 countries/regions. The bibliometric map highlighted the close relationship between countries/regions (Fig.3 ). Collaborative efforts across countries/regions resulted in thicker line segments between nodes. In recent years, Japan and India have had the highest publication numbers. The bibliometric map highlighted the close relationship between countries/regions.

### **Institutions**

Of the included studies, Int Agcy Res Canc & Amer Canc Soc contributed the most papers (N = 17), followed by NCI (N = 10), which were the institutions with more than 10 publications. Also, Univ Texas MD Anderson Canc Ctr (N = 7), Ctr Dis Control & Prevent, and Univ Sydney (N = 6) had the most publications, and Amer Canc Soc had the most citations (N = 24157), followed by Int Agcy Res. Canc (N = 7429) and NCI (N = 2046). Int Agcy Res Canc and Amer Canc Soc are institutions that have published more articles in recent years. (Fig.4 )

### **3.5 Journal**

The dual-journal map overlay shows the three main citation pathways (Figure 5), with papers published in Medicine/ Medicine/ Clinical/ Sports/ Neuro/ Immunity journals citing Genes/ Biology/ Genetics and Surgery/ Rehabilitation/ Sports. paper. This conclusion can be used as a reference for new scholars engaged in CCS research.

### **3.6 Keywords co-occurrence, clusters, and bursts**

A total of 242 keywords were identified in the top 100 cited papers, with a total of 997 connecting lines between keywords. We excluded keywords such as place names and then evaluated the data shown in the graphs. The most common keywords were cervical cancer (N = 34), women (N = 21), human papillomavirus (N = 16), colorectal cancer (N = 16), and breast cancer (N = 15). Among them, human papillomavirus (N = 16) was an important causative factor for cervical cancer. Colorectal cancer (N = 16), breast cancer (N = 15), and lung cancer (N = 9) were strongly associated with cervical cancer. Human papillomavirus vaccination (N = 10) is an effective means of preventing cervical cancer (Table 3). In other areas, The United States (N = 16) and Africa (N = 2) were the two most frequent countries. Pelvic radiation therapy (N = 4) as a treatment for advanced cervical cancer.

Clustering makes it easy to determine the distribution of research content on a given topic. The smaller the cluster ordinal number, the more nodes it contains, indicating that the more keywords it contains, the hotter the clustering research. These keywords are further subdivided into 13 clusters, of which the first 10 clusters are as follows (Fig. 6): cluster 1 (cancer statistics), cluster 2 (cervical screening), cluster 3 (hpv vaccine), cluster 4 (human papillomavirus testing), cluster 5 (systematic review), cluster 6 (three-layer perceptron), cluster 7 (cervical cancer tumorigenesis), cluster 8 (cancer screening), cluster 9 (ASCAP).

We created a keyword timeline chart to analyze trends in keyword research in recent years (Fig. 7). Back before 2014, researchers realized that long-term HPV infection

can lead to cervical cancer, and HPV, cervical cancer screening, and HPV vaccine to prevent cervical cancer have been hot research topics in recent years. In recent years, researchers have studied the development of cervical cancer and the safety of treatment from cytology and molecular. The results of cluster analysis suggest that the safety and efficacy of cervical cancer prevention, screening, and treatment may be the focus and trend of future research on CCS.

### **3.7 Burst**

We created keyword emergence charts to illustrate the hot trends in research for cervical cancer screening in recent years (Fig. 8). Initially, there was interest in the relationship between breast, colorectal, and lung cancer and cervical cancer. Human papillomavirus was the longest studied of all the keywords. In recent years, researchers have been focusing on the diagnosis, infection mortality, and risk. Infection and diagnosis have become a new research topic, indicating that researchers are more and more focused on the prevention and diagnosis of cervical cancer. The results of cluster analysis suggest that prevention of infection and early diagnosis of cervical cancer may be the focus and trend of future research on CCS.

### **3.8 Co-cited articles and co-cited reference cluster**

Typically we use co-citation relationships to determine the degree of connectivity between different publications, which is said to occur if two or more articles are cited in one or more articles at the same time. Therefore, we create cluster network diagrams and co-citation relationships via citespace (Fig. 9). According to the clustering diagram ( $Q = 0.8602$ ,  $S = 0.9525$ ), the quality of the clustering diagram is generally considered to be better when  $Q > 0.3$  and  $S > 0.5$ . Therefore, the results of the clustering diagram in this study are convincing. Figure 11 depicts the evolution of cluster analyses over several years of co-cited papers and co-cited references for the top 100 cited documents. We used CiteSpace software to calculate the citations with the highest burst intensity over the last 10 years. Figure 10 lists the cited papers[19-42].

Of all the discourses on CCS, a multicenter study by Ronco, G. et al. showed the importance of HPV-based or liquid-based cytology for early CC detection. Arbyn, M tested hr-HPV women for cervical intraepithelial neoplasia grade 2 or worse by performing hrHPV testing as well as colposcopy and biopsy and therefore concluded that hrHPV testing is important in the early diagnosis of CC. Hall, MT used a modeling study to estimate the age-standardized incidence of CC in HPV-vaccinated women a few years later and is on track to reach a target of 4 new cases per 100,000 women per year in the future. In conclusion, most trials have shown the importance of early screening for the diagnosis of CC and the availability of a CC vaccine to help prevent CC.

## **Analysis**

## **Discussion**

Over the past nearly two decades, researchers have made many efforts and achieved promising results in the early diagnosis and prevention of CC, but barriers remain and future ones need to be broken through.

### **General information from the top 100 cited papers**

In this study, we summarised the 100 most cited papers screened by CCS. Using rigorously standardized bibliometric and visual analysis methods, we derive global trends regarding the most frequently cited literature in the field of CCS research. Based on specific analyses and reliable metrics, bibliometric analyses can be analysed to summarise the characteristics of published articles, and assessing the most cited papers can provide medical researchers in the field with both important information about the focus of this research direction and future research directions.

In terms of the types of articles selected, most of the top 100 cited papers are original articles, mostly distributed between 2013 and 2023. The top 20 most cited papers account for approximately 80% of all citations in the top 100 most cited papers. Ronco, G was the main contributor to the most influential article, indicating that their research is a potential hotspot in the field [17]. Siegel, RL et al. 2019 published "Cancer Statistics,2019" in *Ca-a Cancer Journal for Clinicians* and received the most citations [11]. By summarizing the morbidity and mortality of CC and the fact that CC has been effectively controlled in recent years, this article demonstrates that early diagnosis and prevention of CC have a huge impact on the diagnosis and treatment of the disease [43-46]. Recently Singh, D et al. published "Global Estimates of incidence and mortality of Cervical Cancer in 2020: A Baseline Analysis of the WHO Global Cervical Cancer Elimination Initiative" in *Lancet Global Health* addresses the dramatic changes in the global cervical cancer landscape today by assessing the extent of inequalities in global cervical cancer incidence and mortality to accelerate progress towards the WHO's goal of eliminating CC [47].

The United States has the highest number of publications (N = 70), and in recent years, Japan and India have had the highest number of publications. This indicates that the United States has invested a lot of research in early screening and prevention of CC and has obtained significant results [44,46], and more countries are paying



more attention to the prevention of CC [48-52].

## **Limitations**

This study also has several limitations as follows. Although Web of Science is the most commonly used database for literature searches, it may have some of its earlier publications missing. In order to perform an accurate search of the literature, we used a title keyword search method, which may result in them being accurate enough but may not be comprehensive enough.

## **Conclusion**

To our knowledge, this is the first bibliometric assessment of the most frequently cited literature on the early diagnosis of CC. The findings suggest that most of the important studies on CC were published in the last decade. Increasing attention is being paid to the early diagnosis and prevention of CC both nationally and internationally. Future research directions include universal access to vaccines, simplicity of early screening for CC, screening for risk genes relevant to clinical studies of CC, and clinical trials of treatments.

## **Author contributions**

LL conducted this study, produced the first draft, and refined it. Literature search, retrieval and data collection were conducted by CSC, SCX and CC. Data visualisation and graphical interpretation were carried out by CC and CSC. SL and YB were instrumental in providing significant support or funding. All authors participated and approved the final paper before submission.

**Funding** Key research program of science and technology in hebei province (No.20210997).

## **Declarations**

The authors declare that the study was conducted in the absence of any commercial or financial relationships that could be interpreted as potential conflicts of interest. Informed consent is not applicable.

**Informed consent** Not applicable

**Ethical review** This article is a visual analysis of a published article to which ethical review does not apply.

## **References**

1. Cohen PA, Jhingran A, Oaknin A, et al. Cervical cancer. *Lancet*. 2019 Jan 12;393(10167):169-182.
2. Vu M, Yu J, Awolude OA, et al. Cervical cancer worldwide. *Curr Probl Cancer*. 2018 Sep;42(5):457-465.

3. Joshi R, Alim M, Kengne AP, et al. Task shifting for non-communicable disease management in low and middle income countries--a systematic review. *PLoS One*. 2014 Aug 14;9(8):e103754.
4. Harper DM, DeMars LR. HPV vaccines - A review of the first decade. *Gynecol Oncol*. 2017 Jul;146(1):196-204.
5. Massad LS, Einstein MH; 2012 ASCCP Consensus Guidelines Conference, et al. 2012 updated consensus guidelines for the management of abnormal cervical cancer screening tests and cancer precursors. *Obstet Gynecol*. 2013 Apr;121(4):829-846.
6. Siegel RL, Fedewa SA, Miller KD, et al. Cancer statistics for Hispanics/Latinos, 2015. *CA Cancer J Clin*. 2015 Nov-Dec;65(6):457-80.
7. Smith RA, Andrews KS, Brooks D, et al. Cancer screening in the United States, 2018: A review of current American Cancer Society guidelines and current issues in cancer screening. *CA Cancer J Clin*. 2018 Jul;68(4):297-316.
8. van Eck NJ, Waltman L. Software survey: VOSviewer, a computer program for bibliometric mapping. *Scientometrics*. 2010;84:523-38.
9. Liang M, Meng Y, Zhou S, et al. Research hotspots and trends analysis of ankylosing spondylitis: a bibliometric and scientometric analysis from 2009 to 2018. *Ann Transl Med*. 2020;8:1445.
10. Torre LA, Bray F, Siegel RL, et al. Global cancer statistics, 2012. *CA Cancer J Clin*. 2015 Mar;65(2):87-108.
11. Siegel RL, Miller KD, Jemal A. Cancer statistics, 2019. *CA Cancer J Clin*. 2019 Jan;69(1):7-34.
12. Torre LA, Siegel RL, Ward EM, et al. Global Cancer Incidence and Mortality Rates and Trends--An Update. *Cancer Epidemiol Biomarkers Prev*. 2016 Jan;25(1):16-27.
13. Global Burden of Disease Cancer Collaboration; Fitzmaurice C, Dicker D, et al. The Global Burden of Cancer 2013. *JAMA Oncol*. 2015 Jul;1(4):505-27.
14. Arbyn M, Weiderpass E, Bruni L, et al. Estimates of incidence and mortality of cervical cancer in 2018: a worldwide analysis. *Lancet Glob Health*. 2020 Feb;8(2):e191-e203.
15. Allemani C, Weir HK, CONCORD Working Group; Carreira H, et al. Global surveillance of cancer survival 1995-2009: analysis of individual data for 25,676,887 patients from 279 population-based registries in 67 countries (CONCORD-2). *Lancet*. 2015 Mar 14;385(9972):977-1010.
16. de Martel C, Plummer M, Vignat J, et al;. Worldwide burden of cancer attributable to HPV by site, country and HPV type. *Int J Cancer*. 2017 Aug 15;141(4):664-670.
17. Ronco G, Dillner J, Elfström KM; International HPV screening working group; et al. Efficacy of HPV-based screening for prevention of invasive cervical cancer: follow-up of four European randomised controlled trials. *Lancet*. 2014 Feb 8;383(9916):524-32.
18. DeSantis CE, Miller KD, Goding Sauer A, et al. Cancer statistics for African Americans, 2019. *CA Cancer J Clin*. 2019 May;69(3):211-233.

19. Arbyn M, Weiderpass E, Bruni L, et al. Estimates of incidence and mortality of cervical cancer in 2018: a worldwide analysis. *Lancet Glob Health*. 2020 Feb;8(2):e191-e203. doi: 10.1016/S2214-109X(19)30482-6
20. Saslow D, Solomon D, Lawson HW, et al. American Cancer Society, American Society for Colposcopy and Cervical Pathology, and American Society for Clinical Pathology screening guidelines for the prevention and early detection of cervical cancer. *Am J Clin Pathol*. 2012 Apr;137(4):516-42.
21. National Lung Screening Trial Research Team; Aberle DR, Adams AM, Berg CD, et al. Reduced lung-cancer mortality with low-dose computed tomographic screening. *N Engl J Med*. 2011 Aug 4;365(5):395-409.
22. Plummer M, Franceschi S, Vignat J, et al. Global burden of gastric cancer attributable to *Helicobacter pylori*. *Int J Cancer*. 2015 Jan 15;136(2):487-90.
23. Center MM, Jemal A, Lortet-Tieulent J, et al. International variation in prostate cancer incidence and mortality rates. *Eur Urol*. 2012 Jun;61(6):1079-92.
24. Anderson BO, Cazap E, El Saghir NS, et al. Optimisation of breast cancer management in low-resource and middle-resource countries: executive summary of the Breast Health Global Initiative consensus, 2010. *Lancet Oncol*. 2011 Apr;12(4):387-98.
25. Forman D, de Martel C, Lacey CJ, et al. Global burden of human papillomavirus and related diseases. *Vaccine*. 2012 Nov 20;30 Suppl 5:F12-23.
26. Alemany L, Cubilla A, Halc G, et al. Role of Human Papillomavirus in Penile Carcinomas Worldwide. *Eur Urol*. 2016 May;69(5):953-61.
27. Alemany L, Saunier M, Alvarado-Cabrero I, et al. Human papillomavirus DNA prevalence and type distribution in anal carcinomas worldwide. *Int J Cancer*. 2015 Jan 1;136(1):98-107.
28. Agorastos T, Chatzistamatiou K, Katsamagkas T, et al. Primary screening for cervical cancer based on high-risk human papillomavirus (HPV) detection and HPV 16 and HPV 18 genotyping, in comparison to cytology. *PLoS One*. 2015 Mar 20;10(3):e0119755.
29. Ronco G, Dillner J, Elfström KM, Tunesi S, et al. Efficacy of HPV-based screening for prevention of invasive cervical cancer: follow-up of four European randomised controlled trials. *Lancet*. 2014 Feb 8;383(9916):524-32.
30. Drolet M, Bénard É, Boily MC, et al. Population-level impact and herd effects following human papillomavirus vaccination programmes: a systematic review and meta-analysis. *Lancet Infect Dis*. 2015 May;15(5):565-80.
31. Alemany L, Saunier M, Tinoco L, et al. Large contribution of human papillomavirus in vaginal neoplastic lesions: a worldwide study in 597 samples. *Eur J Cancer*. 2014 Nov;50(16):2846-54.
32. Cancer Genome Atlas Research Network; Albert Einstein College of Medicine; Analytical Biological Services; et al. Integrated genomic and molecular characterization of cervical cancer. *Nature*. 2017 Mar 16;543(7645):378-384.
33. Ahnen DJ, Wade SW, Jones WF, et al. The increasing incidence of young-onset colorectal cancer: a call to action. *Mayo Clin Proc*. 2014 Feb;89(2):216-24.

34. Lew JB, Simms KT, Smith MA, et al. Primary HPV testing versus cytology-based cervical screening in women in Australia vaccinated for HPV and unvaccinated: effectiveness and economic assessment for the National Cervical Screening Program. *Lancet Public Health*. 2017 Feb;2(2):e96-e107.
35. Watson M, Benard V, King J, et al. National assessment of HPV and Pap tests: Changes in cervical cancer screening, National Health Interview Survey. *Prev Med*. 2017 Jul;100:243-247.
36. US Preventive Services Task Force; Curry SJ, Krist AH, et al. Screening for Cervical Cancer: US Preventive Services Task Force Recommendation Statement. *JAMA*. 2018 Aug 21;320(7):674-686.
37. Simms KT, Smith MA, Lew JB, et al. Will cervical screening remain cost-effective in women offered the next generation nonavalent HPV vaccine? Results for four developed countries. *Int J Cancer*. 2016 Dec 15;139(12):2771-2780.
38. Drolet M, Bénard É, Pérez N, et al. Population-level impact and herd effects following the introduction of human papillomavirus vaccination programmes: updated systematic review and meta-analysis. *Lancet*. 2019 Aug 10;394(10197):497-509.
39. Hall IJ, Tangka FKL, Sabatino SA, et al. Patterns and Trends in Cancer Screening in the United States. *Prev Chronic Dis*. 2018 Jul 26;15:E97.
40. Lei J, Ploner A, Elfström KM, et al. HPV Vaccination and the Risk of Invasive Cervical Cancer. *N Engl J Med*. 2020 Oct 1;383(14):1340-1348.
41. Arbyn M, Weiderpass E, Bruni L, et al. Estimates of incidence and mortality of cervical cancer in 2018: a worldwide analysis. *Lancet Glob Health*. 2020 Feb;8(2):e191-e203.
42. Arbyn M, Smith SB, Temin S, et al. Detecting cervical precancer and reaching underscreened women by using HPV testing on self samples: updated meta-analyses. *BMJ*. 2018 Dec 5;363:k4823.
43. Siegel RL, Miller KD, Jemal A. Cancer statistics, 2023. *CA Cancer J Clin*. 2023 Jan;73(1):17-48.
44. Arbyn M, Smith SB; Collaboration on Self-Sampling and HPV Testing. Detecting cervical precancer and reaching underscreened women by using HPV testing on self samples: updated meta-analyses. *BMJ*. 2018 Dec 5;363:k4823.
45. Fontham ETH, Wolf AMD, Church TR, et al. Cervical cancer screening for individuals at average risk: 2020 guideline update from the American Cancer Society. *CA Cancer J Clin*. 2020 Sep;70(5):321-346.
46. Smith RA, Andrews KS, Brooks D, et al. Cancer screening in the United States, 2019: A review of current American Cancer Society guidelines and current issues in cancer screening. *CA Cancer J Clin*. 2019 May;69(3):184-210.
47. Wright TC, Stoler MH, Behrens CM, et al. Primary cervical cancer screening with human papillomavirus: end of study results from the ATHENA study using HPV as the first-line screening test. *Gynecol Oncol*. 2015 Feb;136(2):189-97.
48. Smith RA, Andrews KS, Brooks D, et al. Cancer screening in the United States, 2018: A review of current American Cancer Society guidelines and current issues in cancer screening. *CA Cancer J Clin*. 2018 Jul;68(4):297-316.

49. Singh D, Vignat J, Lorenzoni V, et al. Global estimates of incidence and mortality of cervical cancer in 2020: a baseline analysis of the WHO Global Cervical Cancer Elimination Initiative. *Lancet Glob Health*. 2023 Feb;11(2):e197-e206.
50. Cibula D, Pötter R, Planchamp F, et al. The European Society of Gynaecological Oncology/European Society for Radiotherapy and Oncology/European Society of Pathology guidelines for the management of patients with cervical cancer. *Radiother Oncol*. 2018 Jun;127(3):404-416.
51. Vaccarella S, Lortet-Tieulent J, Plummer M, et al. Worldwide trends in cervical cancer incidence: impact of screening against changes in disease risk factors. *Eur J Cancer*. 2013 Oct;49(15):3262-73.
52. Torre LA, Sauer AM, Chen MS Jr, et al. Cancer statistics for Asian Americans, Native Hawaiians, and Pacific Islanders, 2016: Converging incidence in males and females. *CA Cancer J Clin*. 2016 May;66(3):182-202.

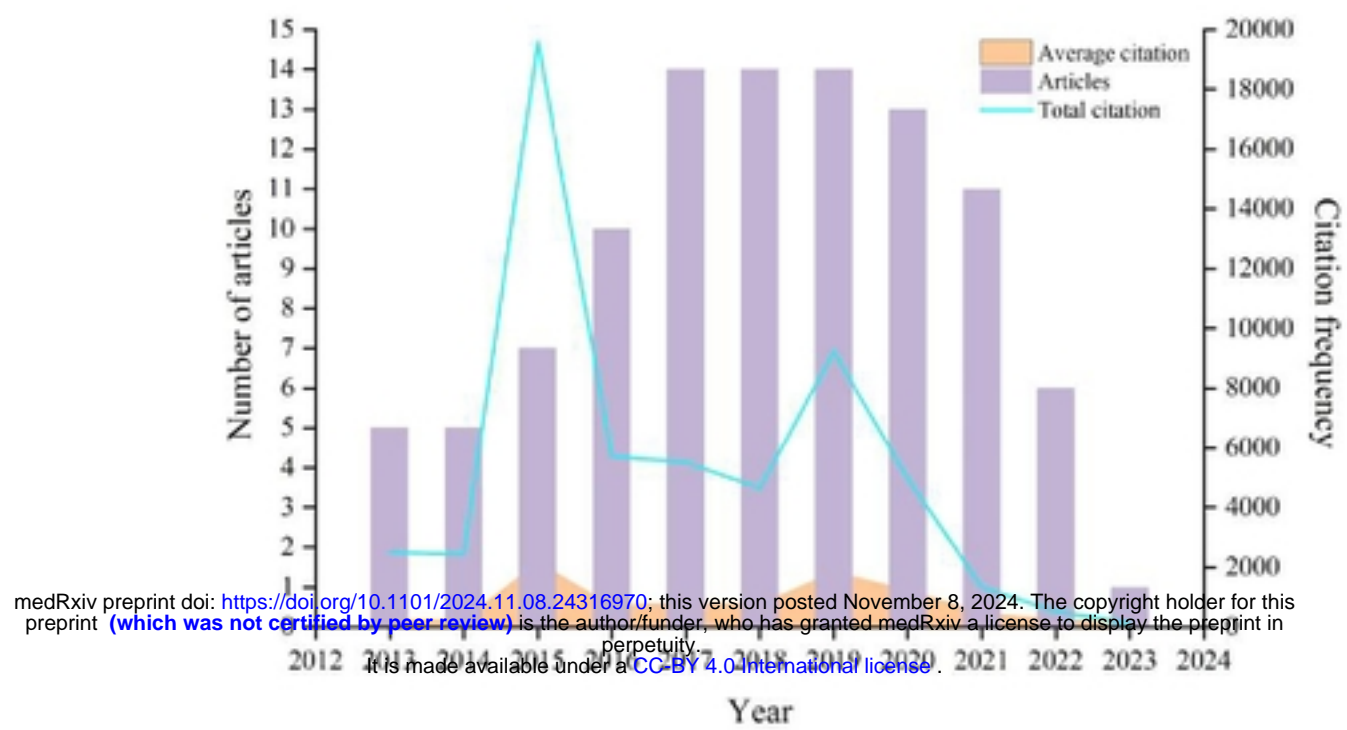

**Fig.1** Year of publication and citation

**Fig. 2** Network visualization of authors that contributed to the top 100 cited papers

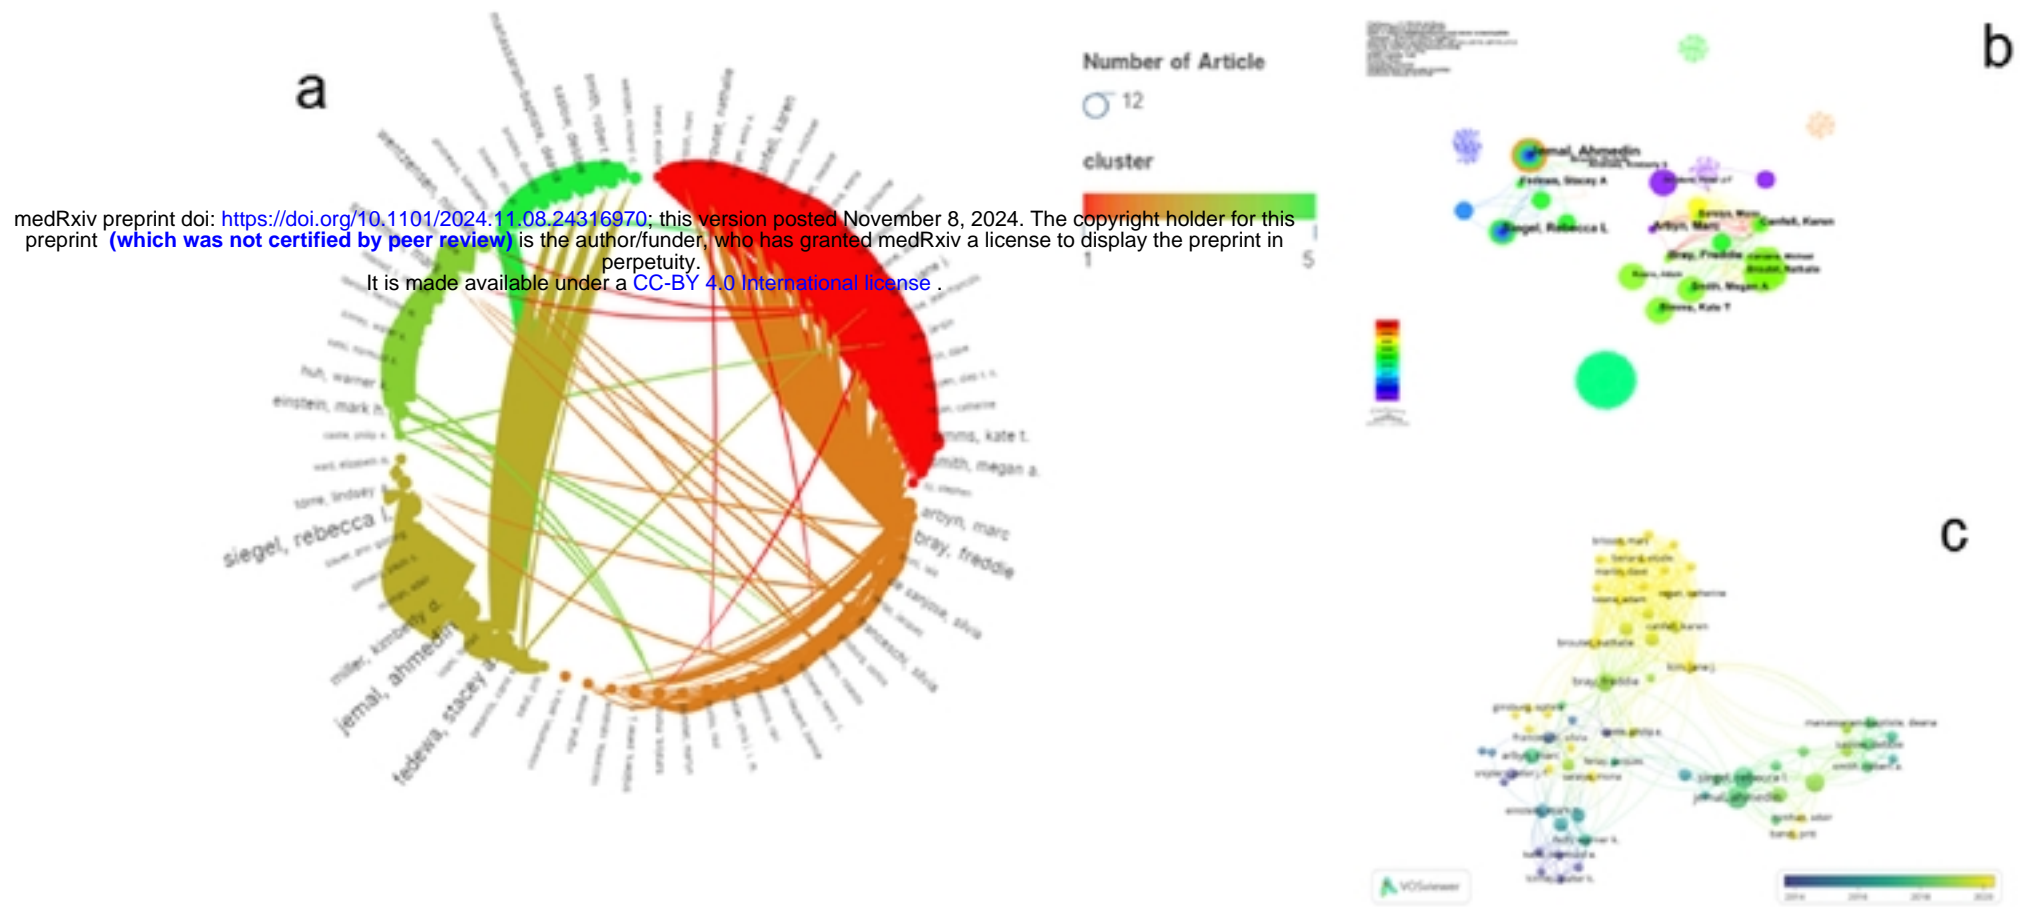





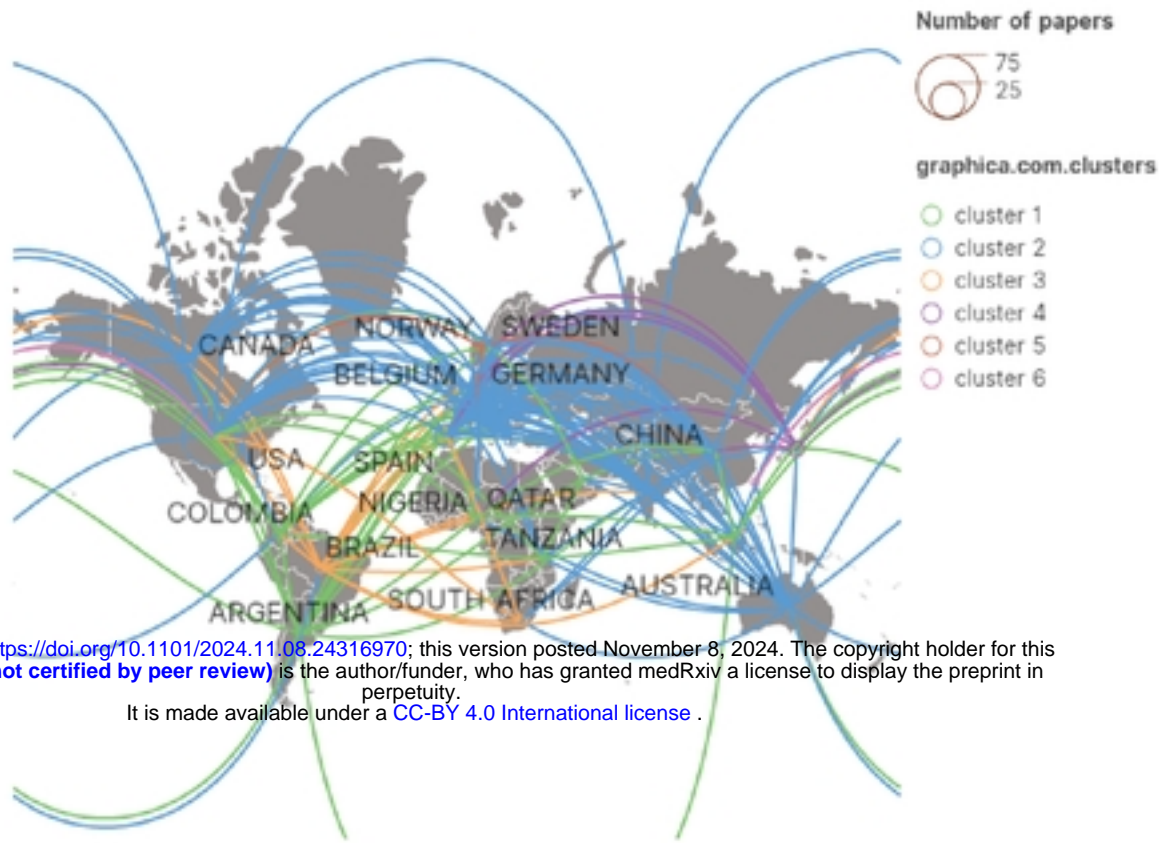

medRxiv preprint doi: <https://doi.org/10.1101/2024.11.08.24316970>; this version posted November 8, 2024. The copyright holder for this preprint (which was not certified by peer review) is the author/funder, who has granted medRxiv a license to display the preprint in perpetuity. It is made available under a [CC-BY 4.0 International license](https://creativecommons.org/licenses/by/4.0/).

CiteSpace v. 5.10.R (64-bit)  
 March 8, 2018 at 12:46:48 AM CST  
 Graph: C:\Users\A\Documents\cancer\_collaborations  
 TimeSpan: 2014-2022 (Static Weighting)  
 Modularity Q: 0.954 (0.95), LRF=1.0, L/N=10, SRF=0, w=1.0  
 Weighted Mean Silhouette S: 0.974 (0.974) (0.974)  
 Language: English  
 Nodes Labeled: 1.0%  
 Pruning: None  
 Modularity Q=0.954  
 Weighted Mean Silhouette S=0.974  
 Harmonic Mean Q+S=0.964

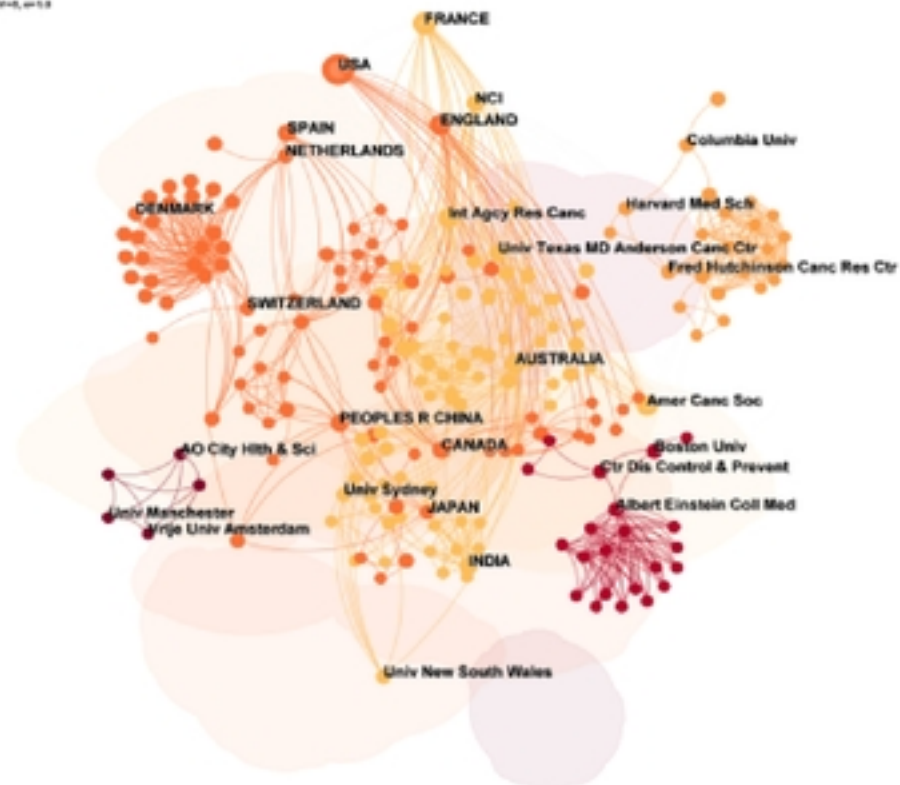

CiteSpace



**Fig.5** dual-journal map

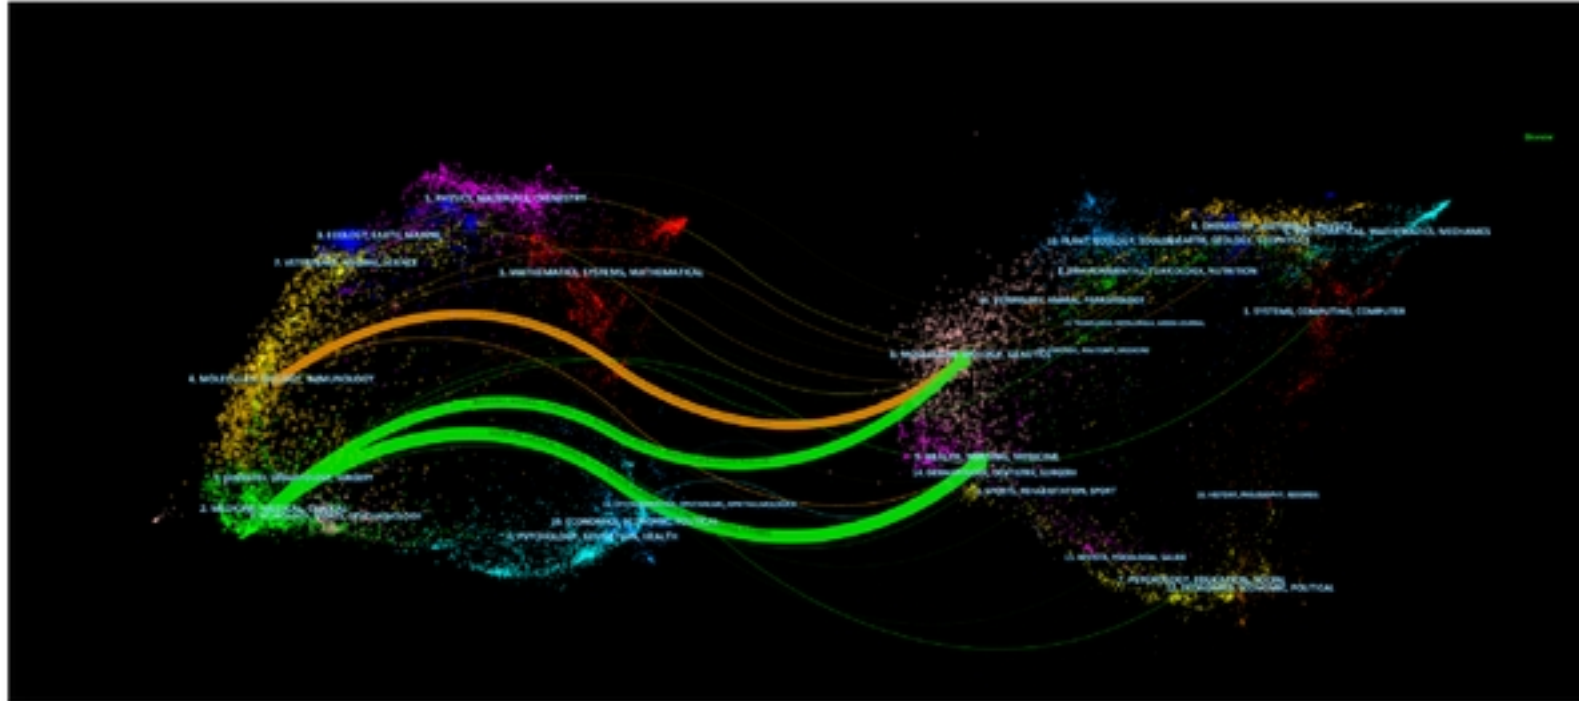

medRxiv preprint doi: <https://doi.org/10.1101/2024.11.08.24316970>; this version posted November 8, 2024. The copyright holder for this preprint (which was not certified by peer review) is the author/funder, who has granted medRxiv a license to display the preprint in perpetuity. It is made available under a [CC-BY 4.0 International license](https://creativecommons.org/licenses/by/4.0/) .

**Fig.6 Network visualization keywords and clustering**

Chakraborty, S. et al. BMC Public Health  
 March 2024, 24(1):1-12  
 https://doi.org/10.1186/s12889-024-16970-7  
 BMC Public Health is a peer-reviewed journal  
 published by Springer Nature in partnership with  
 the Institute of Information Technology, University  
 of Calicut, India.  
 BMC Public Health is an Open Access journal  
 and all articles are available under a Creative Commons  
 Attribution License (CC BY 4.0 International license).

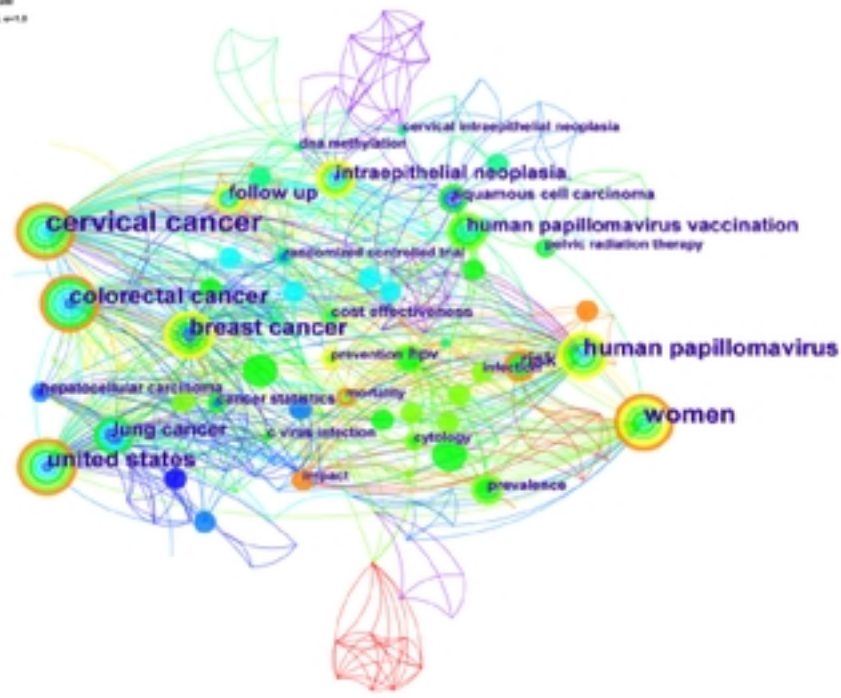

medRxiv preprint doi: <https://doi.org/10.1101/2024.11.08.24316970>; this version posted November 8, 2024. The copyright holder for this preprint (which was not certified by peer review) is the author/funder, who has granted medRxiv a license to display the preprint in perpetuity. It is made available under a [CC-BY 4.0 International license](https://creativecommons.org/licenses/by/4.0/).

Chakraborty, S. et al. BMC Public Health  
 March 2024, 24(1):1-12  
 https://doi.org/10.1186/s12889-024-16970-7  
 BMC Public Health is a peer-reviewed journal  
 published by Springer Nature in partnership with  
 the Institute of Information Technology, University  
 of Calicut, India.  
 BMC Public Health is an Open Access journal  
 and all articles are available under a Creative Commons  
 Attribution License (CC BY 4.0 International license).

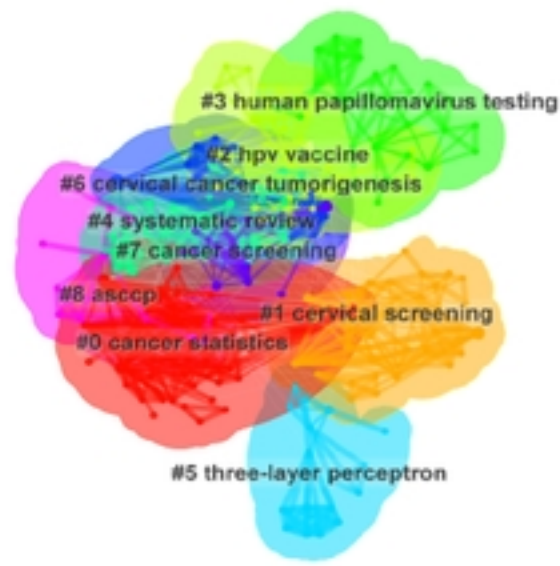



**Fig. 8** Network visualization of the keywords with the strongest citation bursts of the top 100 cited papers

**Top 20 Keywords with the Strongest Citation Bursts**

| Keywords                         | Year | Strength | Begin | End  | 2014 - 2024 |
|----------------------------------|------|----------|-------|------|-------------|
| squamous cell carcinoma          | 2014 | 1.21     | 2014  | 2016 |             |
| breast cancer                    | 2015 | 1.85     | 2015  | 2016 |             |
| hepatocellular carcinoma         | 2015 | 1.77     | 2015  | 2016 |             |
| colorectal cancer                | 2015 | 1.64     | 2015  | 2016 |             |
| lung cancer                      | 2015 | 1.26     | 2015  | 2017 |             |
| randomized controlled trial      | 2016 | 1.38     | 2016  | 2018 |             |
| cervical cancer                  | 2014 | 1.27     | 2016  | 2018 |             |
| follow up                        | 2015 | 1.89     | 2017  | 2018 |             |
| human papillomavirus vaccination | 2017 | 1.61     | 2017  | 2020 |             |
| pelvic radiation therapy         | 2018 | 1.68     | 2018  | 2019 |             |
| women                            | 2016 | 2.78     | 2019  | 2020 |             |
| hpv                              | 2019 | 2.38     | 2019  | 2020 |             |
| prevalence                       | 2019 | 1.97     | 2019  | 2020 |             |
| cytology                         | 2019 | 1.57     | 2019  | 2020 |             |
| prevention                       | 2020 | 1.93     | 2020  | 2021 |             |
| infection                        | 2020 | 1.56     | 2020  | 2022 |             |
| mortality                        | 2020 | 1.56     | 2020  | 2022 |             |
| diagnosis                        | 2020 | 1.17     | 2020  | 2022 |             |
| impact                           | 2022 | 2.32     | 2022  | 2024 |             |
| risk                             | 2019 | 1.74     | 2022  | 2024 |             |

medRxiv preprint doi: <https://doi.org/10.1101/2024.11.08.24316970>; this version posted November 8, 2024. The copyright holder for this preprint (which was not certified by peer review) is the author/funder, who has granted medRxiv a license to display the preprint in perpetuity. It is made available under a [CC-BY 4.0 International license](https://creativecommons.org/licenses/by/4.0/).

**Fig. 9** Co-cited articles and co-cited reference analysis of the top 100 cited papers

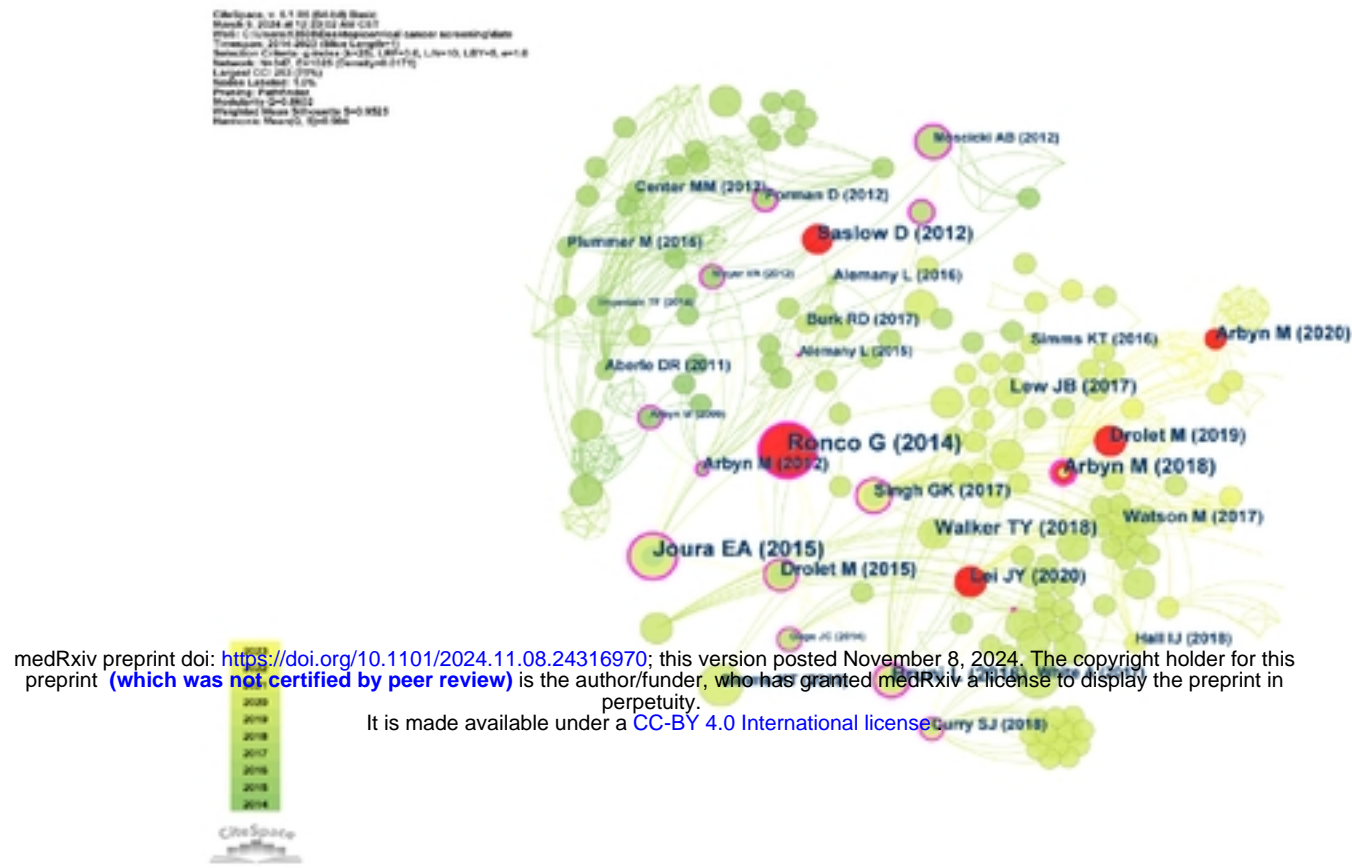

**Fig. 10** Top 25 references with the strongest citation bursts of the top 100 cited papers

**Top 25 References with the Strongest Citation Bursts**

| References                                                                           | Year | Strength | Begin | End  | 2014 - 2023 |
|--------------------------------------------------------------------------------------|------|----------|-------|------|-------------|
| Arbyn M, 2012, VACCINE, V30, PF88, DOI 10.1016/j.vaccine.2012.06.095, DOI            | 2012 | 2.25     | 2014  | 2016 |             |
| Saslow D, 2012, AM J CLIN PATHOL, V137, P516, DOI 10.1309/AJCPTGD94EVR5JCG, DOI      | 2012 | 2.86     | 2015  | 2017 |             |
| Aberle DR, 2011, NEW ENGL J MED, V365, P395, DOI 10.1056/NEJMoa1102873, DOI          | 2011 | 2.05     | 2015  | 2016 |             |
| Plummer M, 2015, INT J CANCER, V136, P487, DOI 10.1002/ijc.28999, DOI                | 2015 | 2.05     | 2015  | 2016 |             |
| Center MM, 2012, EUR UROL, V61, P1079, DOI 10.1016/j.eururo.2012.02.054, DOI         | 2012 | 2.05     | 2015  | 2016 |             |
| Anderson BO, 2011, LANCET ONCOL, V12, P387, DOI 10.1016/S1470-2045(11)70031-6, DOI   | 2011 | 1.02     | 2015  | 2016 |             |
| Forman D, 2012, VACCINE, V30, PF12, DOI 10.1016/j.vaccine.2012.07.055, DOI           | 2012 | 1.95     | 2016  | 2017 |             |
| Aleman L, 2016, EUR UROL, V69, P953, DOI 10.1016/j.eururo.2015.12.007, DOI           | 2016 | 1.64     | 2016  | 2018 |             |
| Aleman L, 2015, INT J CANCER, V136, P98, DOI 10.1002/ijc.28963, DOI                  | 2015 | 1.23     | 2016  | 2018 |             |
| Agorastos T, 2015, PLOS ONE, V10, P0, DOI 10.1371/journal.pone.0119755, DOI          | 2015 | 0.97     | 2016  | 2017 |             |
| Ronco G, 2014, LANCET, V383, P524, DOI 10.1016/S0140-6736(13)62218-7, DOI            | 2014 | 3.14     | 2017  | 2019 |             |
| Drolet M, 2015, LANCET INFECT DIS, V15, P565, DOI 10.1016/S1473-3099(14)71073-4, DOI | 2015 | 1.87     | 2017  | 2019 |             |
| Aleman L, 2014, EUR J CANCER, V50, P2846, DOI 10.1016/j.ejca.2014.07.018, DOI        | 2014 | 1.03     | 2017  | 2018 |             |
| Aleman L, 2014, EUR J CANCER, V50, P2431, DOI 10.1016/j.ejca.2014.07.018, DOI        | 2014 | 1.66     | 2018  | 2019 |             |
| Ahnen DJ, 2014, MAYO CLIN PROC, V116, P16, DOI 10.1016/j.mayocp.2013.09.006, DOI     | 2014 | 0.83     | 2018  | 2019 |             |
| Walker TY, 2018, MMWR-MORBID MORTAL W, V67, P909, DOI 10.15585/mmwr.mm6733a1, DOI    | 2018 | 2.22     | 2019  | 2020 |             |
| Lew JB, 2017, LANCET PUBLIC HEALTH, V2, PE96, DOI 10.1016/S2468-2667(17)30007-5, DOI | 2017 | 1.9      | 2019  | 2020 |             |
| Watson M, 2017, PREV MED, V100, P243, DOI 10.1016/j.ypmed.2017.05.004, DOI           | 2017 | 1.58     | 2019  | 2020 |             |
| Curry SJ, 2018, OBSTET GYNECOL SURV, V73, P689, DOI 10.1001/jama.2018.10897, DOI     | 2018 | 1.26     | 2019  | 2020 |             |
| Simms KT, 2016, INT J CANCER, V139, P2771, DOI 10.1002/ijc.30392, DOI                | 2016 | 1.26     | 2019  | 2020 |             |
| Drolet M, 2019, LANCET, V394, P497, DOI 10.1016/S0140-6736(19)30298-3, DOI           | 2019 | 2.62     | 2020  | 2021 |             |
| Hall LJ, 2018, PREV CHRONIC DIS, V15, P0, DOI 10.5888/pcd15.170465, DOI              | 2018 | 1.49     | 2020  | 2023 |             |
| Lei JY, 2020, NEW ENGL J MED, V383, P1340, DOI 10.1056/NEJMoa1917338, DOI            | 2020 | 3.33     | 2021  | 2023 |             |
| Arbyn M, 2020, LANCET GLOB HEALTH, V8, PE191, DOI 10.1016/S2214-109X(19)30482-6, DOI | 2020 | 3.07     | 2021  | 2023 |             |
| Arbyn M, 2018, BMJ-BRIT MED J, V363, P0, DOI 10.1136/bmj.k4823, DOI                  | 2018 | 2.7      | 2021  | 2023 |             |

medRxiv preprint doi: <https://doi.org/10.1101/2024.11.08.24316970>; this version posted November 8, 2024. The copyright holder for this preprint (which was not certified by peer review) is the author/funder, who has granted medRxiv a license to display the preprint in perpetuity. It is made available under a [CC-BY 4.0 International license](https://creativecommons.org/licenses/by/4.0/).



**Fig. 11** Co-cited articles and co-cited reference cluster analysis of the top 100 cited papers changes by year

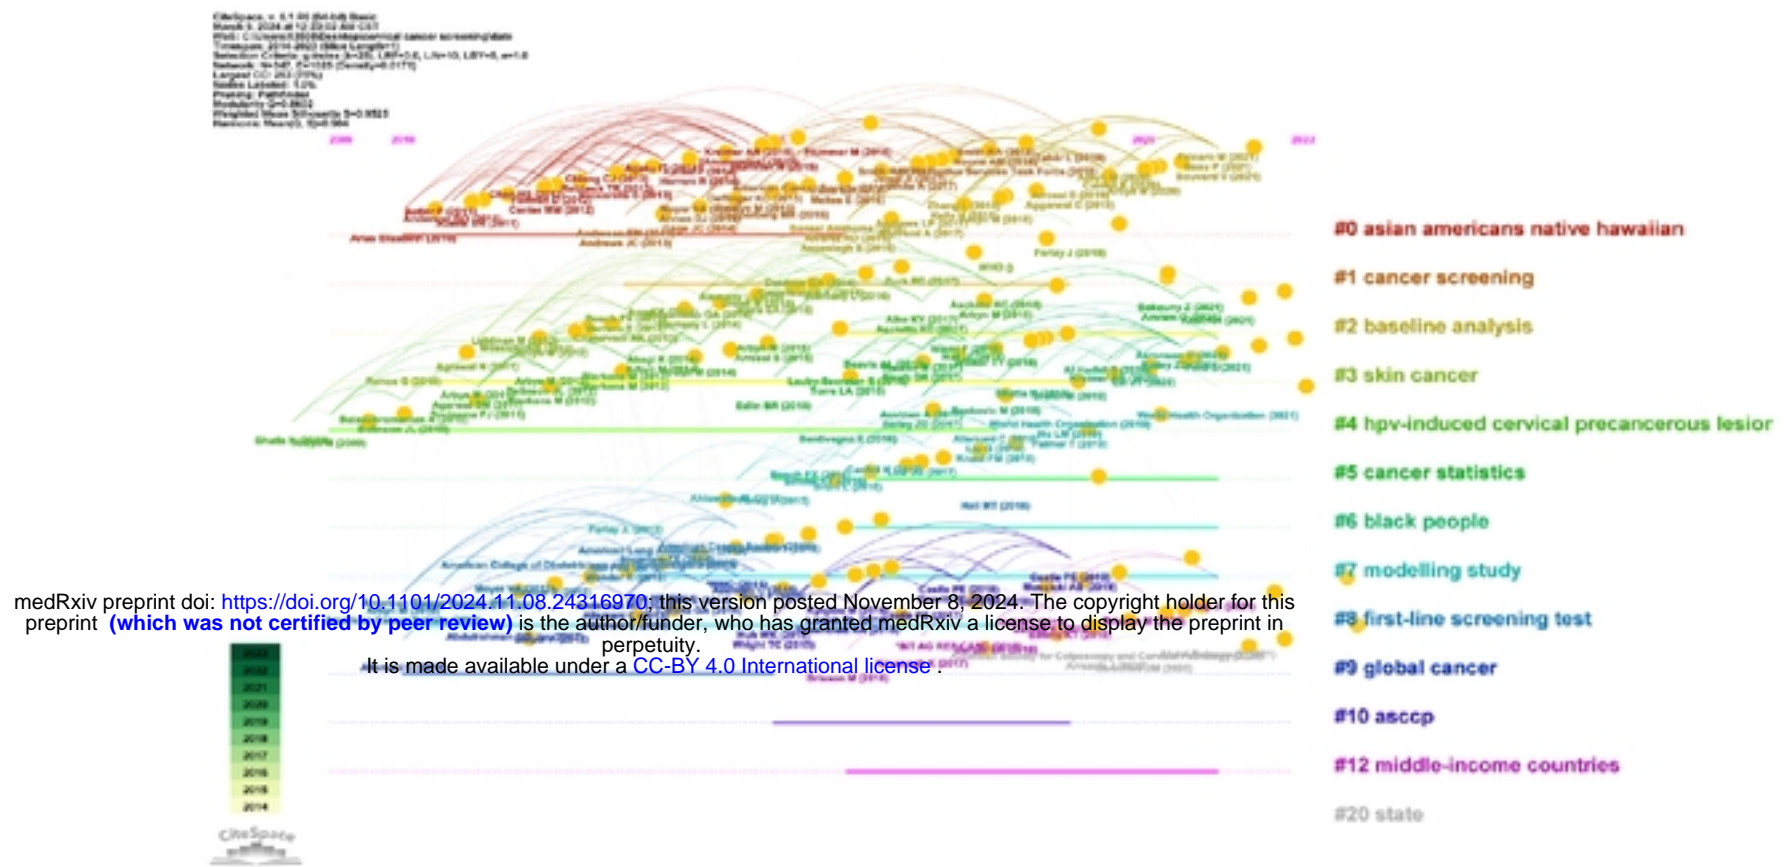

Figure 11

**Table 1** Search strategy

| ID | Result | Search strategy                                                                                                                                                                                                                                                                                                                                                                                                                                                                                                                                                                                                    |
|----|--------|--------------------------------------------------------------------------------------------------------------------------------------------------------------------------------------------------------------------------------------------------------------------------------------------------------------------------------------------------------------------------------------------------------------------------------------------------------------------------------------------------------------------------------------------------------------------------------------------------------------------|
| #1 | 124471 | TS= (“Uterine Cervical Neoplasms” OR “Cervical Neoplasm, Uterine” OR “Neoplasm, Uterine Cervical” OR “Uterine Cervical Neoplasm” OR “Neoplasms, Cervical” OR “Cervical Neoplasms” OR “Cervical Neoplasm” OR “Neoplasms, Cervix” OR “Cervix Neoplasm” OR “Neoplasm, Cervix” OR “Cervix Neoplasms” OR “Cancer of the Uterine Cervix” OR “Cancer of the Cervix” OR “Cervical Cancer” OR “Cancer, Cervical” OR “Cervical Cancers” OR “Uterine Cervical Cancer” OR “Cancer, Uterine Cervical” OR “Cervical Cancer, Uterine” OR “Uterine Cervical Cancers” OR “Cancer of Cervix” OR “Cervix Cancer” OR “Cancer, Cervix”) |
| #2 | 400918 | TS = (“Early Detection of Cancer” OR “Cancer Early Detection” OR “Cancer Screening” OR “Screening, Cancer” OR “Cancer Screening Tests” OR “Cancer Screening Test” OR “Screening Test, Cancer” OR “Screening Tests, Cancer” OR “Test, Cancer Screening” OR “Tests, Cancer Screening” OR “Early Diagnosis of Cancer” OR “Cancer Early Diagnosis”)                                                                                                                                                                                                                                                                    |
| #3 | 28443  | #1 AND #2                                                                                                                                                                                                                                                                                                                                                                                                                                                                                                                                                                                                          |
| #4 | 100    | Top 100 cited papers identified                                                                                                                                                                                                                                                                                                                                                                                                                                                                                                                                                                                    |

medRxiv preprint doi: <https://doi.org/10.1101/2024.11.08.24316970>; this version posted November 8, 2024. The copyright holder for this preprint (which was not certified by peer review) is the author/funder, who has granted medRxiv a license to display the preprint in perpetuity. It is made available under a [CC-BY 4.0 International license](https://creativecommons.org/licenses/by/4.0/).

**Table 2** The top 100 cited papers in CCS

| Title                                                                                                                                                                  | First author      | Journal                                     | Total citation | Year | Average citation by year |
|------------------------------------------------------------------------------------------------------------------------------------------------------------------------|-------------------|---------------------------------------------|----------------|------|--------------------------|
| Global Cancer Statistics.2012                                                                                                                                          | Torre, Lindsey A. | Ca-a Cancer Journal for Clinicians          | 14567          | 2015 | 1618.56                  |
| Cancer statistics,2019                                                                                                                                                 | Siegel, RL        | Ca-a Cancer Journal for Clinicians          | 4436           | 2019 | 887.20                   |
| Global Cancer Incidence and Mortality Rates and Trends-An Update                                                                                                       | Torre, Lindsey A. | Cancer Epidemiology Biomarkers & Prevention | 2501           | 2016 | 312.63                   |
| The Global Burden of Cancer 2013 Global Burden of Disease Cancer Collaboration                                                                                         | Fitzmaurice, C    | Jama Oncology                               | 2107           | 2015 | 234.11                   |
| Estimates of incidence and mortality of cervical cancer in 2018: a worldwide analysis                                                                                  | Arbyn, M          | Lancet Global Health                        | 1785           | 2020 | 446.25                   |
| Global surveillance of cancer survival 1995-2009: analysis of individual data for 25 676 887 patients from 279 population-based registries in 67 countries (CONCORD-2) | Allemani, C       | Lancet                                      | 1673           | 2015 | 185.89                   |
| Cervical cancer                                                                                                                                                        | Cohen, PA         | Lancet                                      | 1202           | 2019 | 240.40                   |
| Efficacy of HPV-based screening for prevention of invasive cervical cancer: follow-up of four European randomised controlled trials                                    | Ronco, G          | Lancet                                      | 1139           | 2014 | 113.90                   |
| Cancer statistics for African Americans, 2019                                                                                                                          | DeSantis, CE      | Ca-a Cancer Journal for Clinicians          | 1116           | 2019 | 223.20                   |

| Title                                                                                                                                                         | First author | Journal                                          | Total citation | Year | Average citation by year |
|---------------------------------------------------------------------------------------------------------------------------------------------------------------|--------------|--------------------------------------------------|----------------|------|--------------------------|
| Global Cancer in Women: Burden and Trend                                                                                                                      | Torre, LA    | Cancer Epidemiology Biomarkers & Prevention      | 763            | 2017 | 109.00                   |
| Head and Neck Squamous Cell Carcinoma: Update on Epidemiology, Diagnosis, and Treatment                                                                       | Marur, S     | Mayo Clinic Proceedings                          | 740            | 2016 | 92.50                    |
| Cervical Cancer: A Global Health Crisis                                                                                                                       | Small, W     | Cancer                                           | 728            | 2017 | 104.00                   |
| 2012 Updated Consensus Guidelines for the Management of Abnormal Cervical Cancer Screening Tests and Cancer Precursors                                        | Massad, LS   | Journal of Lower Genital Tract Disease           | 694            | 2013 | 63.09                    |
| Cancer of the cervix uteri                                                                                                                                    | Bhatla, N    | International Journal of Gynecology & Obstetrics | 657            | 2018 | 109.50                   |
| Screening for Cervical Cancer US Preventive Services Task Force Recommendation Statement                                                                      | Curry, SJ    | Jama-Journal of The American Medical Association | 582            | 2018 | 97.00                    |
| Cancer statistics for African Americans, 2016: Progress and opportunities in reducing racial disparities                                                      | DeSantis, CE | Ca-a Cancer Journal for Clinicians               | 579            | 2016 | 72.38                    |
| Recommendations for the use of next-generation sequencing (NGS) for patients with metastatic cancers: a report from the ESMO Precision Medicine Working Group | Mosele, F    | Annals of Oncology                               | 556            | 2020 | 139.00                   |
| Human papillomavirus and cervical cancer                                                                                                                      | Crosbie, EJ  | Lancet                                           | 551            | 2013 | 50.09                    |

| Title                                                                                                                    | First author | Journal                                                     | Total citation | Year | Average citation by year |
|--------------------------------------------------------------------------------------------------------------------------|--------------|-------------------------------------------------------------|----------------|------|--------------------------|
| Mild Obesity, Physical Activity, Calorie Intake, and the Risks of Cervical Intraepithelial Neoplasia and Cervical Cancer | Lee, JK      | Plos One                                                    | 524            | 2013 | 47.64                    |
| Carcinogenic human papillomavirus infection                                                                              | Schiffman, M | Nature Reviews Disease Primers                              | 508            | 2016 | 63.50                    |
| 2019 ASCCP Risk-Based Management Consensus Guidelines for Abnormal Cervical Cancer Screening Tests and Cancer Precursors | Perkins, RB  | Journal of Lower Genital Tract Disease                      | 507            | 2020 | 126.75                   |
| Cervical Cancer, Version 3.2019                                                                                          | Koh, WJ      | Journal of The National Comprehensive Cancer Network        | 507            | 2019 | 101.40                   |
| Survival after Minimally Invasive Radical Hysterectomy for Early-Stage Cervical Cancer                                   | Melamed, A   | New England Journal of Medicine                             | 463            | 2018 | 77.17                    |
| Accuracy of human papillomavirus testing on self-collected versus clinician-collected samples: a meta-analysis           | Arbyn, M     | Lancet Oncology                                             | 455            | 2014 | 45.50                    |
| Trends in the Utilization of Brachytherapy in Cervical Cancer in the United States                                       | Han, K       | International Journal of Radiation Oncology Biology Physics | 402            | 2013 | 36.55                    |

| Title                                                                                                                                                                                       | First author | Journal                            | Total citation | Year | Average citation by year |
|---------------------------------------------------------------------------------------------------------------------------------------------------------------------------------------------|--------------|------------------------------------|----------------|------|--------------------------|
| Detecting cervical precancer and reaching underscreened women by using HPV testing on self samples: updated meta-analyses                                                                   | Arbyn, M     | BMJ-British Medical Journal        | 399            | 2018 | 66.50                    |
| Cervical cancer screening for individuals at average risk: 2020 guideline update from the American Cancer Society                                                                           | Fontham, ETH | Ca-a Cancer Journal for Clinicians | 398            | 2020 | 99.50                    |
| Cancer screening in the United States, 2019: A review of current American Cancer Society guidelines and current issues in cancer screening                                                  | Smith, RA    | Ca-a Cancer Journal for Clinicians | 390            | 2019 | 78.00                    |
| Primary cervical cancer screening with human papillomavirus: End of study results from the ATHENA study using HPV as the first-line screening test                                          | Wright, TC   | Gynecologic Oncology               | 379            | 2015 | 42.11                    |
| Cancer Screening in the United States, 2018: A Review of Current American Cancer Society Guidelines and Current Issues in Cancer Screening                                                  | Smith, RA    | Ca-a Cancer Journal for Clinicians | 376            | 2018 | 62.67                    |
| Impact of HPV vaccination and cervical screening on cervical cancer elimination: a comparative modelling analysis in 78 low-income and lower-middle-income countries                        | Brisson, M   | Lancet                             | 358            | 2020 | 89.50                    |
| The European Society of Gynaecological Oncology/European Society for Radiotherapy and Oncology/European Society of Pathology guidelines for the management of patients with cervical cancer | Cibula, D    | Radiotherapy And Oncology          | 353            | 2018 | 58.83                    |

| Title                                                                                                                                              | First author | Journal                                                     | Total citation | Year | Average citation by year |
|----------------------------------------------------------------------------------------------------------------------------------------------------|--------------|-------------------------------------------------------------|----------------|------|--------------------------|
| Cancer statistics for Hispanics/Latinos, 2015                                                                                                      | Siegel, RL   | Ca-a Cancer Journal for Clinicians                          | 340            | 2015 | 37.78                    |
| Trends in the Utilization of Brachytherapy in Cervical Cancer in the United States                                                                 | Han, K       | Inteenational Journal of Radiation Oncology Biology Physics | 402            | 2013 | 36.55                    |
| Detecting cervical precancer and reaching underscreened women by using HPV testing on self samples: updated meta-analyses                          | Arbyn, M     | BMJ-British Medical Journal                                 | 399            | 2018 | 66.50                    |
| Cervical cancer screening for individuals at average risk: 2020 guideline update from the American Cancer Society                                  | Fontham, ETH | Ca-a Cancer Journal for Clinicians                          | 398            | 2020 | 99.50                    |
| Cancer screening in the United States, 2019: A review of current American Cancer Society guidelines and current issues in cancer screening         | Smith, RA    | Ca-a Cancer Journal for Clinicians                          | 390            | 2019 | 78.00                    |
| Primary cervical cancer screening with human papillomavirus: End of study results from the ATHENA study using HPV as the first-line screening test | Wright, TC   | Gynecologic Oncology                                        | 379            | 2015 | 42.11                    |
| Cancer Screening in the United States, 2018: A Review of Current American Cancer Society Guidelines and Current Issues in Cancer Screening         | Smith, RA    | Ca-a Cancer Journal for Clinicians                          | 376            | 2018 | 62.67                    |

| Title                                                                                                                                                                                       | First author  | Journal                                      | Total citation | Year | Average citation by year |
|---------------------------------------------------------------------------------------------------------------------------------------------------------------------------------------------|---------------|----------------------------------------------|----------------|------|--------------------------|
| Impact of HPV vaccination and cervical screening on cervical cancer elimination: a comparative modelling analysis in 78 low-income and lower-middle-income countries                        | Brisson, M    | Lancet                                       | 358            | 2020 | 89.50                    |
| The European Society of Gynaecological Oncology/European Society for Radiotherapy and Oncology/European Society of Pathology guidelines for the management of patients with cervical cancer | Cibula, D     | Radiotherapy And Oncology                    | 353            | 2018 | 58.83                    |
| Cancer statistics for Hispanics/Latinos, 2015                                                                                                                                               | Siegel, RL    | Ca-a Cancer Journal for Clinicians           | 340            | 2015 | 37.78                    |
| Inflammation and cancer                                                                                                                                                                     | Murata, M     | Environmental Health And Preventive Medicine | 330            | 2018 | 55.00                    |
| Worldwide trends in cervical cancer incidence: Impact of screening against changes in disease risk factors                                                                                  | Vaccarella, S | European Journal of Cancer                   | 328            | 2013 | 29.82                    |
| Task Shifting for Non-Communicable Disease Management in Low and Middle Income Countries - A Systematic Review                                                                              | Joshi, R      | Plos One                                     | 315            | 2014 | 31.50                    |
| ACG Clinical Guideline: Preventive Care in Inflammatory Bowel Disease                                                                                                                       | Farnye, FA    | American Journal of Gastroenterology         | 314            | 2017 | 44.86                    |



| Title                                                                                                                                                   | First author          | Journal                                                 | Total citation | Year | Average citation by year |
|---------------------------------------------------------------------------------------------------------------------------------------------------------|-----------------------|---------------------------------------------------------|----------------|------|--------------------------|
| Breast Cancer Epidemiology, Prevention, and Screening                                                                                                   | Winters, S            | Progress In Molecular Biology And Translational Science | 309            | 2017 | 44.14                    |
| Cancer risk in HIV-infected people in the USA from 1996 to 2012: a population-based, registry-linkage study                                             | Hernández-Ramírez, RU | Lancet Hiv                                              | 286            | 2017 | 40.86                    |
| Cervical cancer worldwide                                                                                                                               | Vu, M                 | Current Problems In Cancer                              | 281            | 2018 | 46.83                    |
| Clinical implications of (epi)genetic changes in HPV-induced cervical precancerous lesions                                                              | Steenbergen, RDM      | Nature Reviews Cancer                                   | 273            | 2014 | 27.30                    |
| Cancer Screening in the United States, 2015: A Review of Current American Cancer Society Guidelines and Current Issues in Cancer Screening              | Smith, RA             | Ca-a Cancer Journal for Clinicians                      | 272            | 2015 | 30.22                    |
| Effects of Community-Based Health Worker Interventions to Improve Chronic Disease Management and Care Among Vulnerable Populations: A Systematic Review | Kim, K                | American Journal of Public Health                       | 271            | 2016 | 33.88                    |
| Cancer Statistics for Asian Americans, Native Hawaiians, and Pacific Islanders, 2016: Converging Incidence in Males and Females                         | Torre, LA             | Ca-a Cancer Journal for Clinicians                      | 270            | 2016 | 33.75                    |
| Evaluation of antioxidant and anticancer activity of copper oxide nanoparticles synthesized using medicinally important plant extracts                  | Rehana,               | Biomedicine & Pharmacotherapy                           | 263            | 2017 | 37.57                    |

| Title                                                                                                                                                                                   | First author   | Journal                                 | Total citation | Year | Average citation by year |
|-----------------------------------------------------------------------------------------------------------------------------------------------------------------------------------------|----------------|-----------------------------------------|----------------|------|--------------------------|
| The human papillomavirus family and its role in carcinogenesis                                                                                                                          | Tommasino, M   | Seminars In Cancer Biology              | 263            | 2014 | 26.30                    |
| Mortality impact of achieving WHO cervical cancer elimination targets: a comparative modelling analysis in 78 low-income and lower-middle-income countries                              | Canfell, K     | Lancet                                  | 255            | 2020 | 63.75                    |
| HPV vaccines - A review of the first decade                                                                                                                                             | Harper, DM     | Gynecologic Oncology                    | 254            | 2017 | 36.29                    |
| The effects of the national HPV vaccination programme in England, UK, on cervical cancer and grade 3 cervical intraepithelial neoplasia incidence: a register-based observational study | Falcaro, M     | Lancet                                  | 251            | 2021 | 83.67                    |
| Skin Cancer: Epidemiology, Disease Burden, Pathophysiology, Diagnosis, and Therapeutic Approaches                                                                                       | Apalla, Z      | Dermatology And Therapy                 | 247            | 2017 | 35.29                    |
| Impact of scaled up human papillomavirus vaccination and cervical screening and the potential for global elimination of cervical cancer in 181 countries, 2020-99: a modelling study    | Simms, KT      | Lancet Oncology                         | 243            | 2019 | 48.60                    |
| Cytology versus HPV testing for cervical cancer screening in the general population                                                                                                     | Koliopoulos, G | Cochrane Database of Systematic Reviews | 243            | 2017 | 34.71                    |
| Human Papillomavirus in Cervical Cancer and Oropharyngeal Cancer: One Cause, Two Diseases                                                                                               | Berman, TA     | Cancer                                  | 242            | 2017 | 34.57                    |

| Title                                                                                                                                                      | First author  | Journal                                                        | Total citation | Year | Average citation by year |
|------------------------------------------------------------------------------------------------------------------------------------------------------------|---------------|----------------------------------------------------------------|----------------|------|--------------------------|
| Presence and Number of Lymph Node Metastases Are Associated With Compromised Survival for Patients Younger Than Age 45 Years With Papillary Thyroid Cancer | Adam, MA      | Journal of Clinical Oncology                                   | 241            | 2015 | 26.78                    |
| The projected timeframe until cervical cancer elimination in Australia: a modelling study                                                                  | Hall, MT      | Lancet Public Health                                           | 240            | 2019 | 48.00                    |
| Invasive Cancer Incidence, 2004-2013, and Deaths, 2006-2015, in Nonmetropolitan and Metropolitan Counties - United States                                  | Henley, SJ    | Mmwr Surveillance Summaries                                    | 240            | 2017 | 34.29                    |
| Estimates of the global burden of cervical cancer associated with HIV                                                                                      | Stelzle, D    | Lancet Global Health                                           | 239            | 2021 | 79.67                    |
| Cervical cancer: screening, diagnosis and staging                                                                                                          | Tsikouras, P  | Journal of Buon                                                | 237            | 2016 | 29.63                    |
| DeepPap: Deep Convolutional Networks for Cervical Cell Classification                                                                                      | Zhang, L      | IEEE Journal of Biomedical And Health Informatics              | 233            | 2017 | 33.29                    |
| National cancer incidence and mortality in China, 2012                                                                                                     | Chen, WQ      | Chinese Journal of Cancer Research<br>Best Practice & Research | 231            | 2016 | 28.88                    |
| The natural history of human papillomavirus infection                                                                                                      | de Sanjosé, S | Clinical Obstetrics & Gynaecology                              | 227            | 2018 | 37.83                    |
| Rural-Urban Differences in Cancer Incidence and Trends in the United States                                                                                | Zahnd, WE     | Cancer Epidemiology Biomarkers & Prevention                    | 226            | 2018 | 37.67                    |

| Title                                                                                                                                                                         | First author | Journal                                       | Total citation | Year | Average citation by year |
|-------------------------------------------------------------------------------------------------------------------------------------------------------------------------------|--------------|-----------------------------------------------|----------------|------|--------------------------|
| Impact of cervical screening on cervical cancer mortality: estimation using stage-specific results from a nested case-control study                                           | Landy, R     | British Journal of Cancer                     | 217            | 2016 | 27.13                    |
| Sentinel lymph node assessment in endometrial cancer: a systematic review and meta-analysis                                                                                   | Smith, AJB   | American Journal of Obstetrics And Gynecology | 216            | 2017 | 30.86                    |
| Breast cancer early detection: A phased approach to implementation                                                                                                            | Ginsburg, O  | Cancer                                        | 208            | 2020 | 52.00                    |
| An Observational Study of Deep Learning and Automated Evaluation of Cervical Images for Cancer Screening                                                                      | Hu, LM       | JNCI-Journal of The National Cancer Institute | 206            | 2019 | 41.20                    |
| A Review of Cervical Cancer: Incidence and Disparities                                                                                                                        | Buskwoffe, A | Journal of The National Medical Association   | 202            | 2020 | 50.50                    |
| Pathology and laboratory medicine in low-income and middle-income countries 1: Access to pathology and laboratory medicine services: a crucial gap                            | Wilson, ML   | Lancet                                        | 200            | 2018 | 33.33                    |
| Human Papillomavirus Infection and Cervical Cancer: Epidemiology, Screening, and Vaccination-Review of Current Perspectives                                                   | Chan, CK     | Journal of Oncology                           | 198            | 2019 | 39.60                    |
| JOURNAL OF ONCOLOGY                                                                                                                                                           | Wang, RJ     | Cancer Letters                                | 197            | 2020 | 49.25                    |
| Near-infrared fluorescence for detection of sentinel lymph nodes in women with cervical and uterine cancers (FILM): a randomised, phase 3, multicentre, non-inferiority trial | Frumovitz, M | Lancet Oncology                               | 192            | 2018 | 32.00                    |

| Title                                                                                                                                                | First author  | Journal                                          | Total citation | Year | Average citation by year |
|------------------------------------------------------------------------------------------------------------------------------------------------------|---------------|--------------------------------------------------|----------------|------|--------------------------|
| Human Papilloma Virus-Associated Cervical Cancer and Health Disparities                                                                              | Olusola, P    | Cells                                            | 188            | 2019 | 37.60                    |
| Opportunities and challenges for human papillomavirus vaccination in cancer                                                                          | Roden, RBS    | Nature Reviews Cancer                            | 187            | 2018 | 31.17                    |
| Cancer statistics for African American/Black People 2022                                                                                             | Giaquinto, AN | Ca-a Cancer Journal for Clinicians               | 183            | 2022 | 91.50                    |
| Cancer overdiagnosis: a biological challenge and clinical dilemma                                                                                    | Srivastava, S | Nature Reviews Cancer                            | 180            | 2019 | 36.00                    |
| Patterns and Trends in Cancer Screening in the United States                                                                                         | Hall, IJ      | Preventing Chronic Disease                       | 179            | 2018 | 29.83                    |
| Impact of provider-patient communication on cancer screening adherence: A systematic review                                                          | Peterson, EB  | Preventive Medicine                              | 162            | 2016 | 20.25                    |
| Cervical cancer in low and middle-income countries                                                                                                   | Hull, R       | Oncology Letters                                 | 149            | 2020 | 37.25                    |
| Data-Driven Cervical Cancer Prediction Model with Outlier Detection and Over-Sampling Methods                                                        | Ijaz, MF      | Sensors                                          | 142            | 2020 | 35.50                    |
| Global estimates of incidence and mortality of cervical cancer in 2020: a baseline analysis of the WHO Global Cervical Cancer Elimination Initiative | Singh, D      | Lancet Global Health                             | 141            | 2023 | 141.00                   |
| Cancer statistics for the US Hispanic/Latino population, 2021                                                                                        | Miller, KD    | Ca-a Cancer Journal for Clinicians               | 137            | 2021 | 45.67                    |
| Self-sampling for human papillomavirus (HPV) testing: a systematic review and meta-analysis                                                          | Yeh, PT       | BMJ Global Health                                | 133            | 2019 | 26.60                    |
| Cancer of the cervix uteri: 2021 update                                                                                                              | Bhatla, N     | International Journal of Gynecology & Obstetrics | 123            | 2021 | 41.00                    |

| Title                                                                                                                                                                                                             | First author | Journal                                               | Total citation | Year | Average citation by year |
|-------------------------------------------------------------------------------------------------------------------------------------------------------------------------------------------------------------------|--------------|-------------------------------------------------------|----------------|------|--------------------------|
| Impact of HPV vaccine hesitancy on cervical cancer in Japan: a modelling study                                                                                                                                    | Simms, KT    | Lancet Public Health                                  | 119            | 2020 | 29.75                    |
| Cervical Cancer Immunotherapy: Facts and Hopes                                                                                                                                                                    | Ferrall, L   | Clinical Cancer Research                              | 101            | 2021 | 33.67                    |
| AI recognition of patient race in medical imaging: a modelling study                                                                                                                                              | Gichoya, JW  | Lancet Digital Health                                 | 100            | 2022 | 50.00                    |
| Mycotoxin exposure and human cancer risk: A systematic review of epidemiological studies                                                                                                                          | Claeys, L    | Comprehensive Reviews In Food Science And Food Safety | 100            | 2020 | 25.00                    |
| Current Prevalence of Major Cancer Risk Factors and Screening Test Use in the United States: Disparities by Education and Race/Ethnicity                                                                          | Samer, AG    | Cancer Epidemiology Biomarkers & Prevention           | 97             | 2019 | 19.40                    |
| The IARC Perspective on Cervical Cancer Screening                                                                                                                                                                 | Bouvard, V   | New England Journal of Medicine                       | 92             | 2021 | 30.67                    |
| Endometriosis and cancer: a systematic review and meta-analysis                                                                                                                                                   | Kvaskoff, M  | Human Reproduction Update                             | 91             | 2021 | 30.33                    |
| Impact of COVID-19 on Cervical Cancer Screening Rates Among Women Aged 21-65 Years in a Large Integrated Health Care System - Southern California, January 1-September 30, 2019, and January 1-September 30, 2020 | Miller, MJ   | MMWR-Morbidity And Mortality Weekly Report            | 87             | 2021 | 29.00                    |
| Cervical cancer screening programmes and age-specific coverage estimates for 202 countries and territories worldwide: a review and synthetic analysis                                                             | Bruni, L     | Lancet Global Health                                  | 85             | 2022 | 42.50                    |

| Title                                                                                                                                                                                                                     | First author | Journal                                            | Total citation | Year | Average citation by year |
|---------------------------------------------------------------------------------------------------------------------------------------------------------------------------------------------------------------------------|--------------|----------------------------------------------------|----------------|------|--------------------------|
| Real-World Effectiveness of Human Papillomavirus Vaccination Against Cervical Cancer                                                                                                                                      | Kjaer, SK    | JNCI-Journal of The National Cancer Institute      | 83             | 2021 | 27.67                    |
| Trends in cervical cancer incidence rates by age, race/ethnicity, histological subtype, and stage at diagnosis in the United States                                                                                       | Islami, F    | Preventive Medicine                                | 83             | 2019 | 16.60                    |
| COVID-19 impact on screening test volume through the National Breast and Cervical Cancer early detection program, January-June 2020, in the United States                                                                 | DeGroff, A   | Preventive Medicine                                | 74             | 2021 | 24.67                    |
| Worldwide use of HPV self-sampling for cervical cancer screening                                                                                                                                                          | Serrano, B   | Preventive Medicine                                | 68             | 2021 | 22.67                    |
| Changes in Cancer Screening in the US During the COVID-19 Pandemic                                                                                                                                                        | Fedewa, SA   | Jama Network Open                                  | 58             | 2022 | 29.00                    |
| Assessment of US Preventive Services Task Force Guideline-Concordant Cervical Cancer Screening Rates and Reasons for Underscreening by Age, Race and Ethnicity, Sexual Orientation, Rurality, and Insurance, 2005 to 2019 | Suk, R       | Jama Network Open                                  | 51             | 2022 | 25.50                    |
| Circular RNAs as emerging players in cervical cancer tumorigenesis; A review to roles and biomarker potentials                                                                                                            | Najafi, S    | International Journal of Biological Macromolecules | 46             | 2022 | 23.00                    |

**Table 3** Top 10 co-occurring keywords in the top 100 cited papers on CCS

| Rank | Keyword                          | Occurrences |
|------|----------------------------------|-------------|
| 1    | cervical cancer                  | 34          |
| 2    | women                            | 21          |
| 3    | human papillomavirus             | 16          |
| 4    | United states                    | 16          |
| 5    | colorectal cancer                | 16          |
| 6    | Breast cancer                    | 15          |
| 7    | Follow up                        | 10          |
| 8    | Intraepithelial neoplasia        | 10          |
| 9    | human papillomavirus vaccination | 10          |

medRxiv preprint doi: <https://doi.org/10.1101/2024.11.06.24316970>; this version posted November 8, 2024. The copyright holder for this preprint (which was not certified by peer review) is the author/funder, who has granted medRxiv a license to display the preprint in perpetuity. It is made available under a [CC-BY 4.0 International license](#).
